# Supplementary material for: Parental Incarceration and Mental Health Among Black Youth: Do Neighborhood and School Assets Mitigate Harms?
Source: Research Square preprint supplement (doi:10.21203/rs.3.rs-6411858/v1), 2025-05-16
Supplement: Supplementary file 1 [file 469ec515004f04b8c0bdc222.docx]

| ***Variable Name*** | ***Variable Description*** |
| --- | --- |
| Youth Age | Screener question: “How old are you?”; Response options were in years and ranged from “11 years or younger” to “22 years or older”; Respondents were screened out of the survey if they responded “11 years or younger” or “22 years or older” due to study eligibility criteria (ages 12-21). |
| Youth Sex | In the demographic information section (Part VI) at the end of the survey, respondents answered whether their sex was male (coded as 1) or female (coded as 0). |
| Youth LGBQ | In the demographic information section (Part VI) at the end of the survey, respondents were asked “What best describes your sexual orientation? 1) heterosexual/straight, 2) homosexual/gay, 3) bisexual, 4) other (fill in the blank), 5) prefer not to say, and 6) unsure. Youth who responded “prefer not to say” were coded as missing; otherwise, youth with non-heterosexual responses were coded as LGBQ. Open-ended responses varied, but most commonly were queer or pansexual. |
| Youth Disconnection | In the demographic information section (Part VI) at the end of the survey, respondents were asked about whether they were currently employed or in school. Those who responded that they were neither employed (part-time or full-time) or in school were designated as disconnected and assigned a value of 1; otherwise, respondents were assigned a value of 0. |
| Youth Multiracial | Screener question: What is your race or ethnicity (SELECT ALL THATY APPLY); Response options included “Black or African American” “Hispanic or Latino/a” “White” “Asian or Pacific Islander” “American Indian or Alaskan Native” and “Other, please specify”; Respondents were screened out of the survey if they did not select “Black or African American”, as this was an explicit eligibility criterion of the study. However, youth were permitted to select other races and ethnicities with which they identify. If youth selected any of the other racial or ethnic categories in addition to Black or African American, they were coded as multiracial (1); otherwise, they were coded as a 0 on this variable. |
| Neighborhood Disorder | This measure is comprised of three items taken from the National Survey of Children’s Health.Specifically, youth were asked, “In your neighborhood, is there 1) Litter or garbage on the street or sidewalk?, 2) Rundown housing like buildings with boarded up windows?, 3) Broken windows or graffiti?” Youth were permitted to endorse each item (yes) or not. Scores were summed for the analysis to range from 0-3. |
| Bio Parents Married | In the demographic information section (Part VI) at the end of the survey, respondents answered whether their biological or birth parents were married to each other at the time of the survey. Respondents answering yes were coded as 1, respondents answering no were coded as 0. |
| Bio Parents Cohabiting | In the demographic information section (Part VI) at the end of the survey, respondents answered whether their biological or birth parents were living together (but not married to each other) at the time of the survey. Respondents answering yes were coded as 1, respondents answering no were coded as 0. |
| Bio Parent Immigrant | In the demographic information section (Part VI) at the end of the survey, respondents were asked, “Were both of your parents born in the United States?” If they answered no, they were coded as a 1; otherwise, they were coded as 0. |
| Maternal Education | In the demographic information section (Part VI) at the end of the survey, respondents were asked, “What is your mother’s highest level of education? If you are unsure, please provide your best guess” Response options included “less than high school”, “some high school but no diploma”, “High school graduate/GED”, “Trade of vocational training”, “some college”, “completed college”, “some graduate degree”, “completed graduate degree”. The final item ranged from 1-8. |
| Household Size | Youth were asked how many people (including them) live in their current household. Response options range from 1 (1) to more than 10 (10). |
