# Supplementary material for: Parental Incarceration and Mental Health Among Black Youth: Do Neighborhood and School Assets Mitigate Harms?
Source: Research Square preprint supplement (doi:10.21203/rs.3.rs-6411858/v1), 2025-05-16
Supplement: Supplementary file 2 [file d3c23a74aa611c2afde4257b.docx]

Appendix: Descriptive Statistics, Stratified by Parental Incarceration

|  | *Full Sample* | *Parental Incarceration* | |
| --- | --- | --- | --- |
|  | (*n* = 345) | **Yes** (*n* = 62) | **No** (*n* = 283) |
|  | Mean (SD) or % | Mean (SD) or % | Mean (SD) or % |
| ***Dependent Variables*** |  |  |  |
| Self-Rated Mental Health | 3.48 (1.45) | 2.97 (1.55) | 3.60 (1.40) |
| Depressive Symptoms | 2.06 (0.60) | 2.33 (0.55) | 2.01 (0.59) |
| Anxiety Symptoms | 2.03 (0.77) | 2.29 (0.59) | 1.98 (0.79) |
| ***Independent Variable*** |  |  |  |
| Parental Incarceration | 17.97% | - | - |
| ***Covariates*** |  |  |  |
| Youth Age | 17.83 (1.59) | 17.66 (1.99) | 17.87 (1.50) |
| Youth Sex (Male = 1) | 53.04% | 53.23% | 53.00% |
| Youth Straight | 60.00% | 64.52% | 59.01% |
| Youth Lesbian/Gay | 20.29% | 14.52% | 21.56% |
| Youth Bisexual | 13.62% | 17.74% | 12.72% |
| Youth Queer | 6.09% | 3.23% | 6.71% |
| Youth Disconnected | 34.49% | 46.77% | 31.80% |
| Youth Multiracial | 3.48% | 0.00% | 4.24% |
| Neighborhood Disorder | 1.39 (0.98) | 1.61 (0.96) | 1.34 (0.98) |
| Bio Parents Married | 17.68% | 16.13% | 18.02% |
| Bio Parents Cohabiting | 4.93% | 6.45% | 4.59% |
| Bio Parents Other Relationship Status | 77.39% | 77.42% | 77.39% |
| Parent Immigrant | 8.12% | 6.45% | 8.48% |
| Maternal Education | 3.91 (1.89) | 4.26 (2.06) | 3.83 (1.85) |
| Household Size | 4.18 (1.97) | 4.26 (2.17) | 4.16 (1.92) |
| ***Moderating Variables*** |  |  |  |
| Neighborhood Social Capital | 2.72 (0.82) | 2.68 (0.64) | 2.73 (0.85) |
| Perceived School Supports | 2.91 (1.14) | 2.85 (0.80) | 2.93 (1.20) |

Note: SD = standard deviation. *n* = sample size.
